# Supplementary material for: Navigating the nuances: comparative analysis and hyperparameter optimisation of neural architectures on contrast-enhanced MRI for liver and liver tumour segmentation
Source: PubMed Central journal article supplement (PMC10861452; doi:10.1038/s41598-024-53528-9), 2024-02-12
Supplement: 41598_2024_53528_MOESM1_ESM.pdf [file 41598_2024_53528_MOESM1_ESM.pdf]

## Appendix

### 0.1 Patch size optimisation

**Table S1.** Performance evolution on test images over liver during the patch size optimisation. BS corresponds to values obtained by the baseline model and PS by the retained models at the end of the patch size optimisation. Dash symbols correspond to the models for which the baseline corresponds to the retained configuration.

| Model           | Dice |      | 5mm SD |      | Precision |      | Recall |      | HD (mm) |       |
|-----------------|------|------|--------|------|-----------|------|--------|------|---------|-------|
|                 | BS   | PS   | BS     | PS   | BS        | PS   | BS     | PS   | BS      | PS    |
| nnFormer        | 94.2 | 95.0 | 91.9   | 94.5 | 94.6      | 95.6 | 93.9   | 94.5 | 72.9    | 48.8  |
| nnUNet          | -    | 95.1 | -      | 94.6 | -         | 94.7 | -      | 95.4 | -       | 38.8  |
| SegmentationNet | 94.6 | 94.3 | 93.9   | 93.7 | 94.8      | 95.0 | 94.5   | 93.8 | 52.0    | 46.4  |
| Swin-UNETR      | -    | 89.6 | -      | 82.9 | -         | 85.0 | -      | 95.4 | -       | 131.5 |
| TransBTS        | 90.5 | 93.7 | 86.7   | 92.2 | 88.9      | 97.4 | 92.8   | 90.3 | 134.0   | 52.0  |
| UNETR           | -    | 91.9 | -      | 86.8 | -         | 91.3 | -      | 92.9 | -       | 104.8 |
| VT-UNet         | -    | 92.8 | -      | 89.1 | -         | 91.4 | -      | 94.6 | -       | 86.1  |

**Table S2.** Performance evolution on test images over tumour during the patch size optimisation. BS corresponds to values obtained by the baseline model and PS by the retained models at the end of the patch size optimisation. Missing values corresponds to the models for which the baseline corresponds to the retained configuration.

| Model           | Dice |      | 5mm SD |      | Precision |      | Recall |      | HD (mm) |       |
|-----------------|------|------|--------|------|-----------|------|--------|------|---------|-------|
|                 | BS   | PS   | BS     | PS   | BS        | PS   | BS     | PS   | BS      | PS    |
| nnFormer        | 68.5 | 69.7 | 67.6   | 67.7 | 78.9      | 82.9 | 65.7   | 64.4 | 66.7    | 72.3  |
| nnUNet          | -    | 68.1 | -      | 67.5 | -         | 78.8 | -      | 67.9 | -       | 60.2  |
| SegmentationNet | 55.9 | 57.7 | 52.5   | 53.8 | 61.6      | 67.9 | 55.1   | 56.5 | 91.5    | 85.4  |
| Swin-UNETR      | -    | 47.7 | -      | 42.0 | -         | 48.7 | -      | 57.2 | -       | 162.9 |
| TransBTS        | 51.4 | 55.5 | 47.9   | 50.3 | 60.4      | 74.1 | 53.6   | 48.7 | 171.5   | 88.8  |
| UNETR           | -    | 33.1 | -      | 30.0 | -         | 40.9 | -      | 31.9 | -       | 121.7 |
| VT-UNet         | -    | 54.3 | -      | 49.6 | -         | 61.1 | -      | 55.8 | -       | 98.0  |

### 0.2 Pre-processing and data augmentation optimisation

**Table S3.** Performance evolution on test images over liver during the data pre-processing and data augmentation optimisation. PS corresponds to values obtained by the patch size optimised models and DA by the retained models at the end of the data pre-processing and data augmentation optimisation.

| Model           | Dice |      | 5mm SD |      | Precision |      | Recall |      | HD (mm) |      |
|-----------------|------|------|--------|------|-----------|------|--------|------|---------|------|
|                 | PS   | DA   | PS     | DA   | PS        | DA   | PS     | DA   | PS      | DA   |
| nnFormer        | 95.0 | 95.0 | 94.5   | 94.7 | 95.6      | 95.8 | 94.5   | 94.3 | 48.8    | 27.8 |
| nnUNet          | 95.1 | 95.1 | 94.6   | 95.2 | 94.7      | 95.3 | 95.4   | 94.9 | 38.8    | 27.0 |
| SegmentationNet | 94.3 | 94.3 | 93.7   | 93.7 | 95.0      | 95.0 | 93.8   | 93.7 | 46.4    | 30.0 |
| Swin-UNETR      | 89.6 | 94.4 | 82.9   | 93.1 | 85.0      | 96.4 | 95.4   | 92.5 | 131.5   | 42.5 |
| TransBTS        | 93.7 | 94.4 | 92.2   | 93.2 | 97.4      | 95.8 | 90.3   | 93.1 | 52.0    | 45.2 |
| UNETR           | 91.9 | 93.1 | 86.8   | 90.2 | 91.3      | 94.3 | 92.9   | 92.1 | 104.8   | 62.7 |
| VT-UNet         | 92.8 | 94.4 | 89.1   | 93.3 | 91.4      | 94.6 | 94.6   | 94.3 | 86.1    | 41.0 |

**Table S4.** Performance evolution on test images over tumour during the data pre-processing and data augmentation optimisation. PS corresponds to values obtained by the patch size optimised models and DA by the retained models at the end of the data pre-processing and data augmentation optimisation.

| Model           | Dice |      | 5mm SD |      | Precision |      | Recall |      | HD (mm) |       |
|-----------------|------|------|--------|------|-----------|------|--------|------|---------|-------|
|                 | PS   | DA   | PS     | DA   | PS        | DA   | PS     | DA   | PS      | DA    |
| nnFormer        | 69.7 | 66.1 | 67.7   | 65.5 | 82.9      | 76.2 | 64.4   | 63.7 | 72.3    | 53.1  |
| nnUNet          | 68.1 | 68.0 | 67.5   | 66.4 | 78.8      | 73.1 | 67.9   | 71.7 | 60.2    | 70.0  |
| SegmentationNet | 57.7 | 61.7 | 53.8   | 58.3 | 67.9      | 74.2 | 56.5   | 59.2 | 85.4    | 84.8  |
| Swin-UNETR      | 47.7 | 55.1 | 42.0   | 50.9 | 48.7      | 78.2 | 57.2   | 48.0 | 162.9   | 58.5  |
| TransBTS        | 55.5 | 55.7 | 50.3   | 51.4 | 74.1      | 74.6 | 48.7   | 49.1 | 88.8    | 86.8  |
| UNETR           | 33.1 | 43.1 | 30.0   | 36.5 | 40.9      | 49.6 | 31.9   | 41.8 | 121.7   | 118.7 |
| VT-UNet         | 54.3 | 56.6 | 49.6   | 53.9 | 61.1      | 71.6 | 55.8   | 56.0 | 98.0    | 72.7  |

### 0.3 Learning paradigm optimisation

**Table S5.** Performance evolution on test images over tumour during the learning paradigm optimisation. DA corresponds to values obtained by the retained models at the end of the data pre-processing and data augmentation optimisation and LP by the retained models at the end of the learning paradigm optimisation.

| Model           | Dice |      | 5mm SD |      | Precision |      | Recall |      | HD (mm) |       |
|-----------------|------|------|--------|------|-----------|------|--------|------|---------|-------|
|                 | DA   | LP   | DA     | LP   | DA        | LP   | DA     | LP   | DA      | LP    |
| nnFormer        | 95.0 | 94.7 | 94.5   | 94.7 | 95.6      | 95.6 | 94.5   | 93.8 | 48.8    | 33.5  |
| nnUNet          | 95.1 | 95.0 | 95.2   | 95.0 | 95.3      | 94.9 | 94.9   | 95.1 | 27.0    | 39.0  |
| SegmentationNet | 94.3 | 91.6 | 93.7   | 89.2 | 95.0      | 95.8 | 93.7   | 88.7 | 30.0    | 41.8  |
| Swin-UNETR      | 94.4 | 94.9 | 93.1   | 94.4 | 96.4      | 94.8 | 92.5   | 91.1 | 42.5    | 47.3  |
| TransBTS        | 94.4 | 95.1 | 93.2   | 95.1 | 95.8      | 95.9 | 93.1   | 94.4 | 45.2    | 24.9  |
| UNETR           | 93.1 | 92.3 | 90.2   | 87.7 | 94.3      | 93.1 | 92.1   | 91.9 | 62.7    | 117.3 |
| VT-UNet         | 94.4 | 93.8 | 93.3   | 91.3 | 94.6      | 93.9 | 94.3   | 93.8 | 41.0    | 69.9  |

**Table S6.** Performance evolution on the test dataset, for the tumour during the learning paradigm optimisation. DA corresponds to values obtained by the retained models at the end of the data pre-processing and data augmentation optimisation and LP by the retained models at the end of the learning paradigm optimisation.

| Model           | Dice |      | 5mm SD |      | Precision |      | Recall |      | HD (mm) |       |
|-----------------|------|------|--------|------|-----------|------|--------|------|---------|-------|
|                 | DA   | LP   | DA     | LP   | DA        | LP   | DA     | LP   | DA      | LP    |
| nnFormer        | 69.7 | 68.2 | 67.7   | 67.4 | 82.9      | 83.5 | 64.4   | 61.1 | 72.3    | 68.2  |
| nnUNet          | 68.0 | 68.1 | 66.4   | 67.8 | 73.1      | 84.2 | 71.7   | 63.9 | 70.0    | 60.1  |
| SegmentationNet | 61.7 | 58.3 | 58.3   | 54.3 | 74.2      | 70.8 | 59.2   | 58.6 | 84.8    | 85.8  |
| Swin-UNETR      | 55.1 | 61.1 | 50.9   | 56.7 | 78.2      | 78.2 | 48.0   | 55.8 | 58.5    | 74.3  |
| TransBTS        | 55.7 | 62.1 | 51.4   | 59.2 | 74.6      | 73.1 | 49.1   | 59.9 | 86.8    | 73.7  |
| UNETR           | 43.1 | 41.5 | 30.0   | 35.3 | 49.6      | 50.7 | 41.8   | 39.2 | 118.7   | 138.1 |
| VT-UNet         | 56.6 | 55.9 | 53.9   | 52.9 | 71.6      | 63.8 | 56.0   | 56.6 | 72.7    | 100.5 |
